# Supplementary figures and images for: Quasi-static electric fields phenomena in the ionosphere associated with pre- and post earthquake effects
Source: Copernicus journal article supplement (doi:10.5194/nhess-8-101-2008), 2008-02-21

|       |      |    |    |           |         |         |     |      |      |     |      |   |  |  |     |     |     |       |
|-------|------|----|----|-----------|---------|---------|-----|------|------|-----|------|---|--|--|-----|-----|-----|-------|
| PDE   | 1981 | 11 | 25 | 093640.34 | -3.200  | 142.150 | 24  | 1.06 | 5.6  | 21  | 4.7Z | 2 |  |  | 200 | 112 | ... | .1.P. |
| ..... |      |    |    |           |         |         |     |      |      |     |      |   |  |  |     |     |     |       |
| PDE   | 1981 | 11 | 25 | 104057.91 | -4.849  | 153.518 | 72  | 0.97 | 5.4  | 12  |      |   |  |  | 190 | 085 | ... | .1.P. |
| ..... |      |    |    |           |         |         |     |      |      |     |      |   |  |  |     |     |     |       |
| PDE   | 1981 | 11 | 26 | 064646.32 | -39.643 | 174.039 | 206 | 0.94 | 5.1  | 5   |      |   |  |  | 159 | 024 | ... | .1.P. |
| ..... |      |    |    |           |         |         |     |      |      |     |      |   |  |  |     |     |     |       |
| PDE   | 1981 | 11 | 27 | 193842.63 | -4.941  | 153.875 | 108 | D 11 | 1.12 | 5.4 | 23   |   |  |  | 190 | 085 | ... | .1.P. |
| ..... |      |    |    |           |         |         |     |      |      |     |      |   |  |  |     |     |     |       |

---

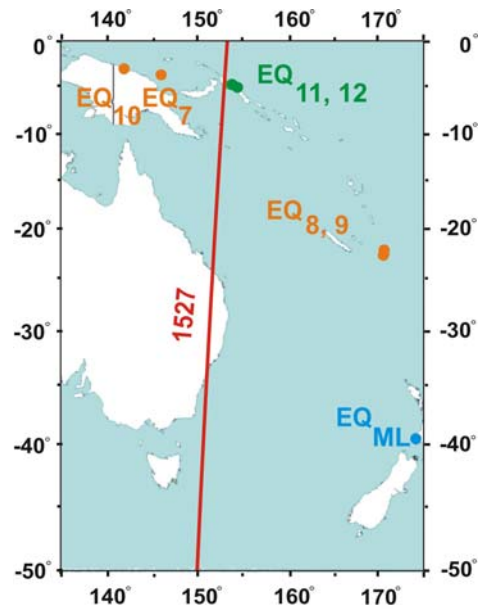

INTERCOSMOS - BULGARIA - 1300  
satellite orbit no 1527 up on 23.11.1981

Supplement: Supplementary file 1 [file nhess-8-101-2008-supplement.pdf]
